# Supplementary material for: Influences of Substrate Grain Size on the Burrowing Behavior of Juvenile Meretrix meretrix
Source: MDPI journal article supplement (doi:10.3390/ani12162094), 2022-08-16
Supplement: s1 [file s1]

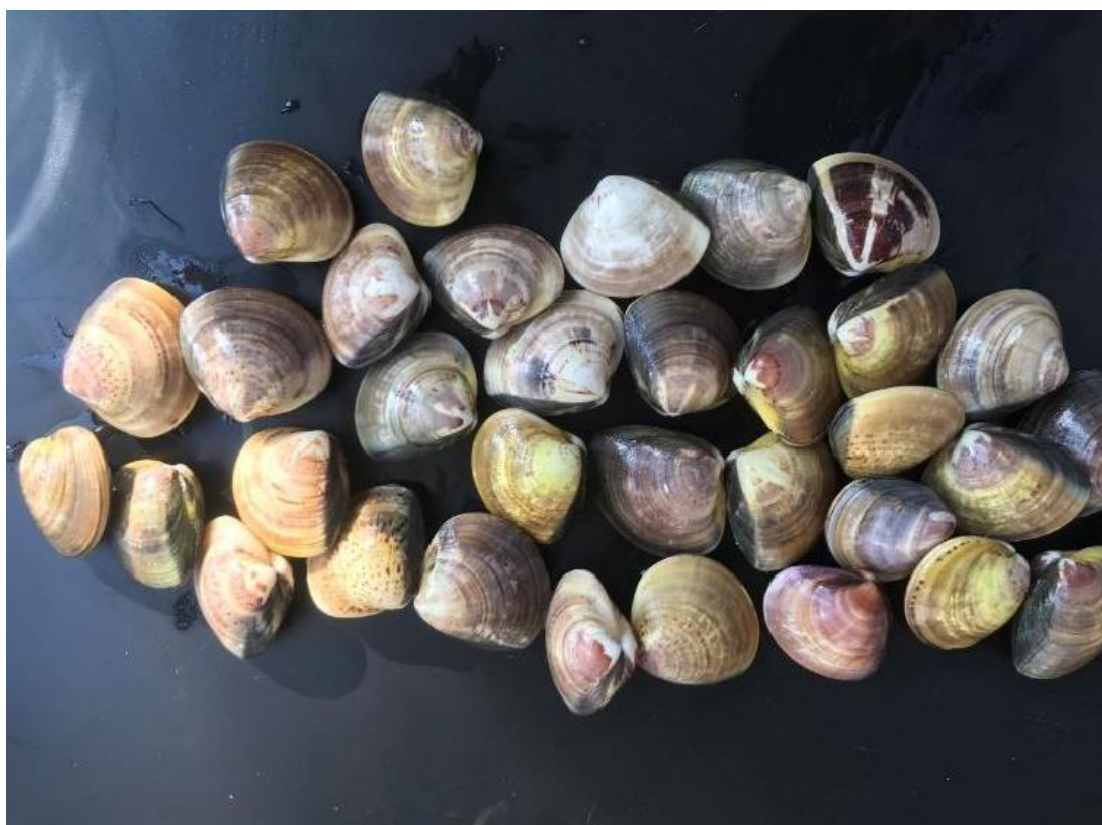

Figure S1. The photo of *Meretrix meretrix*.

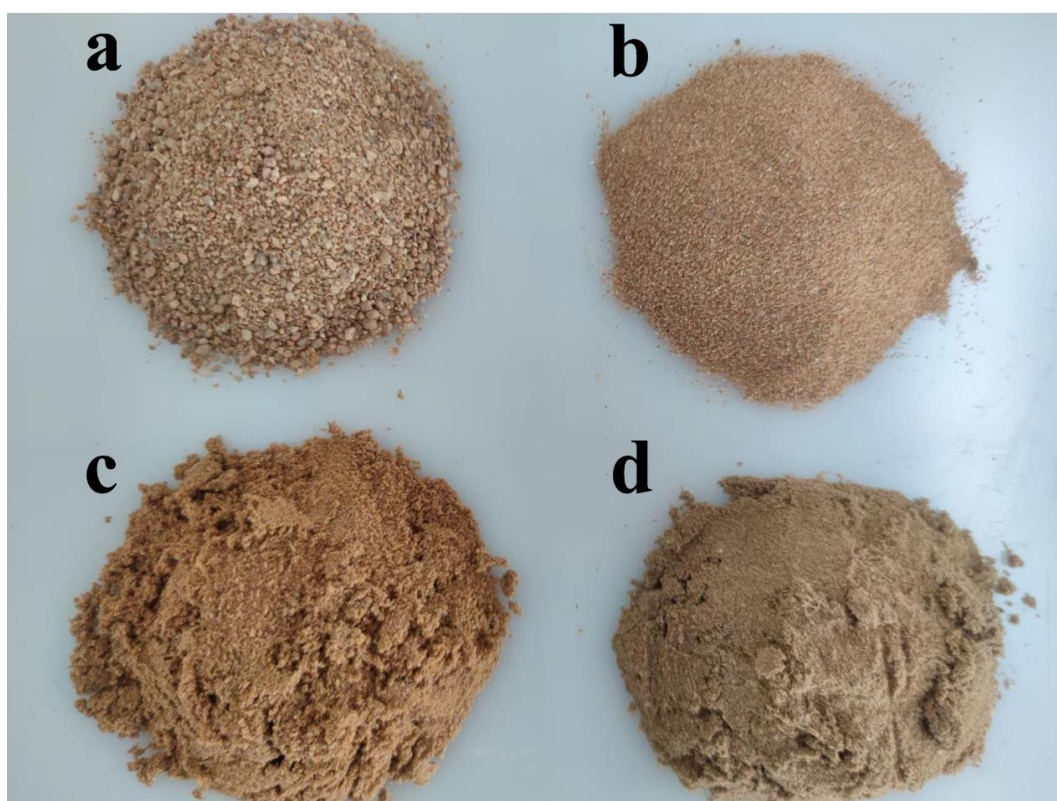

Figure S2. Four substrates. (a), coarse sand; (b), medium sand; (c), fine sand; and (d), natural substrate.

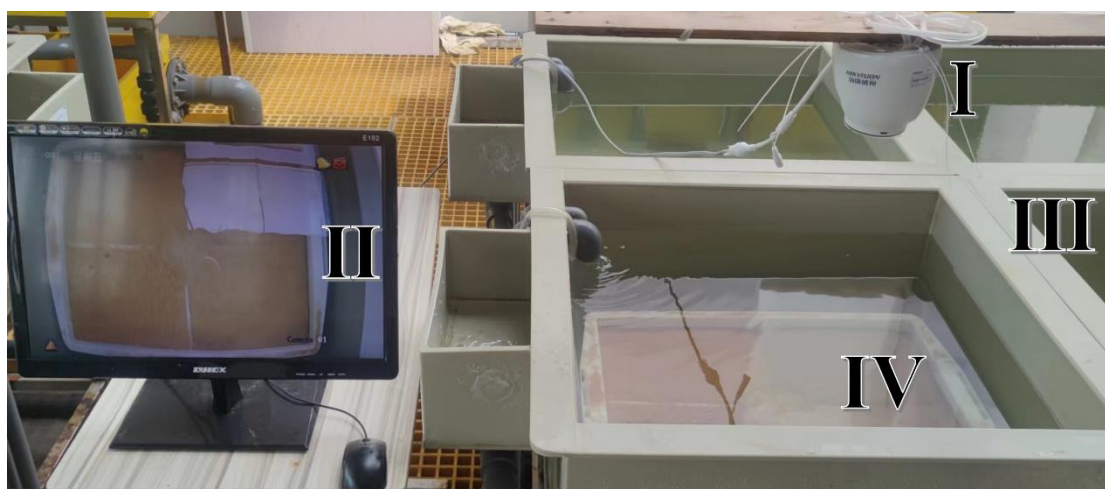

**Figure S3.** The entire experimental apparatus. Unit I is a camera (4 MP), unit II is a monitor (546.1 mm), unit III is the recirculating water system, unit IV is the experimental device.
